# Supplementary material for: Oligopyridine ligands derived from amino acid precursors: Their Zn2+ complexation and effects on hepatic stellate cell functions
Source: Royal Society of Chemistry journal article supplement (doi:10.1039/b806548a), 2008-01-01
Supplement: b806548a.pdf [file b806548a.pdf]

## Supporting Information

### **Oligopyridine Ligands Derived from Amino Acid Precursors: Their Zn<sup>2+</sup> Complexation and Effects on Hepatic Stellate Cell Functions**

Hiroshi Tsukube,<sup>\*a</sup> Yuki Noda,<sup>a</sup> Yumiko Kataoka,<sup>a</sup> Hiroyuki Miyake,<sup>a</sup> Satoshi Shinoda,<sup>a</sup> Akiko Kojima-Yuasa,<sup>\*b</sup> Yoshitake Nishida,<sup>b</sup> and Isao Matsui-Yuasa<sup>b</sup>

<sup>a</sup> *Department of Chemistry, Graduate School of Science, Osaka City University, Sugimoto, Sumiyoshi-ku, Osaka 558-8585, Japan. Fax: +81-6-6605-2560; Tel: +81-6-6605-2560; E-mail: tsukube@sci.osaka-cu.ac.jp*

<sup>b</sup> *Department of Food and Human Health Sciences, Graduate School of Human Life Science, Osaka City University, Sugimoto, Sumiyoshi-ku, Osaka 558-8585, Japan Fax: +81-6-6605-2810; Tel: +81-6-6605-2865; E-mail: kojima@life.osaka-cu.ac.jp*

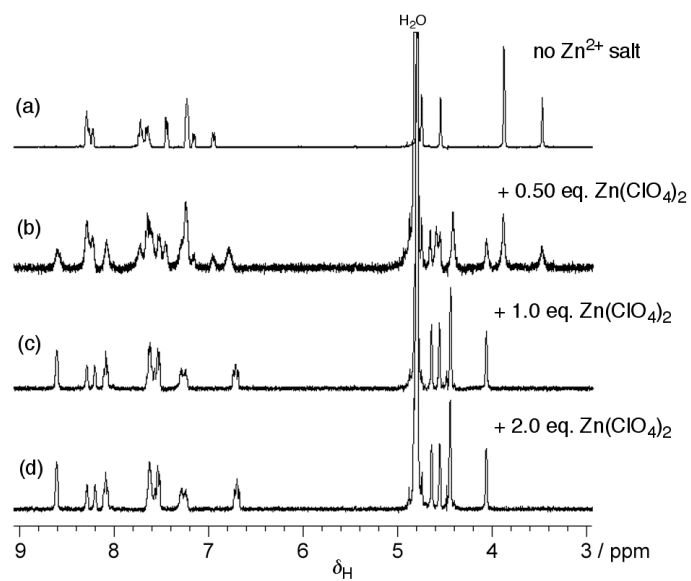

**Fig. S1**  $^1\text{H}$  NMR spectral changes of ligand **3a** upon  $\text{Zn}^{2+}$  complexation.

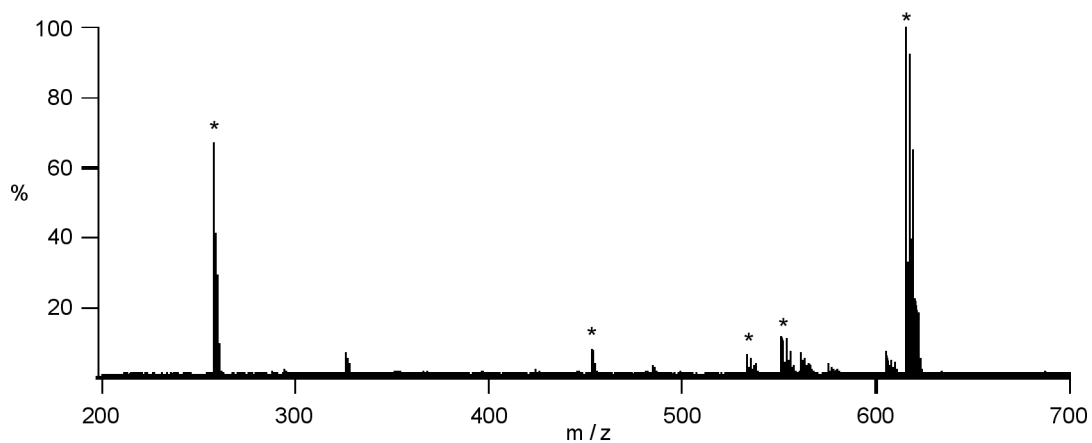

**Fig. S2.** ESI-MS spectrum of an equimolar mixture of **3b** and  $\text{Zn}(\text{ClO}_4)_2$  in  $\text{H}_2\text{O}$ .  $[\mathbf{3b}] = [\text{Zn}^{2+}] = 2.2 \times 10^{-4}$  mol/L.

$[\mathbf{3b} + \text{Zn}^{2+}]^{2+}$ :  $m/z = 258.2$ ;  $[\mathbf{3b} + \text{H}^+]^+$ :  $m/z = 453.4$ ;  $[\mathbf{3b} + \text{Zn}^{2+} + \text{OH}^-]^+$ :  $m/z = 533.2$ ;

$[\mathbf{3b} + \text{Zn}^{2+} + \text{OH}^- + \text{H}_2\text{O}]^+$ :  $m/z = 551.3$ ;  $[\mathbf{3b} + \text{Zn}^{2+} + \text{ClO}_4^-]^+$ :  $m/z = 615.3$ .

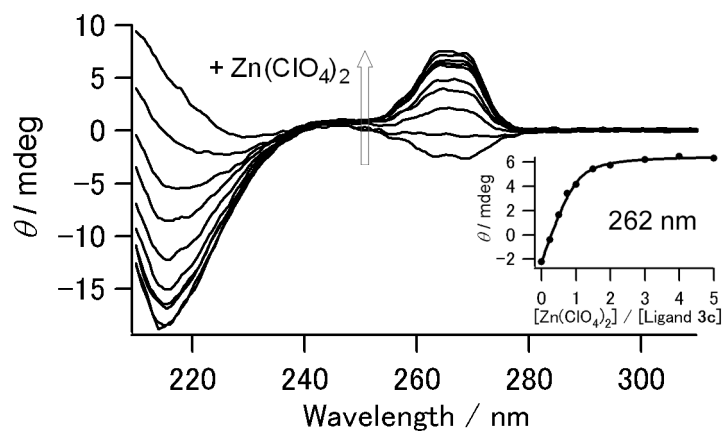

**Fig. S3.** CD spectral changes and titration curve for  $\log K'$  determination of **3c**- $\text{Zn}(\text{ClO}_4)_2$  complex in aqueous solutions.  $[\mathbf{3c}] = 4.0 \times 10^{-5}$  mol/L.

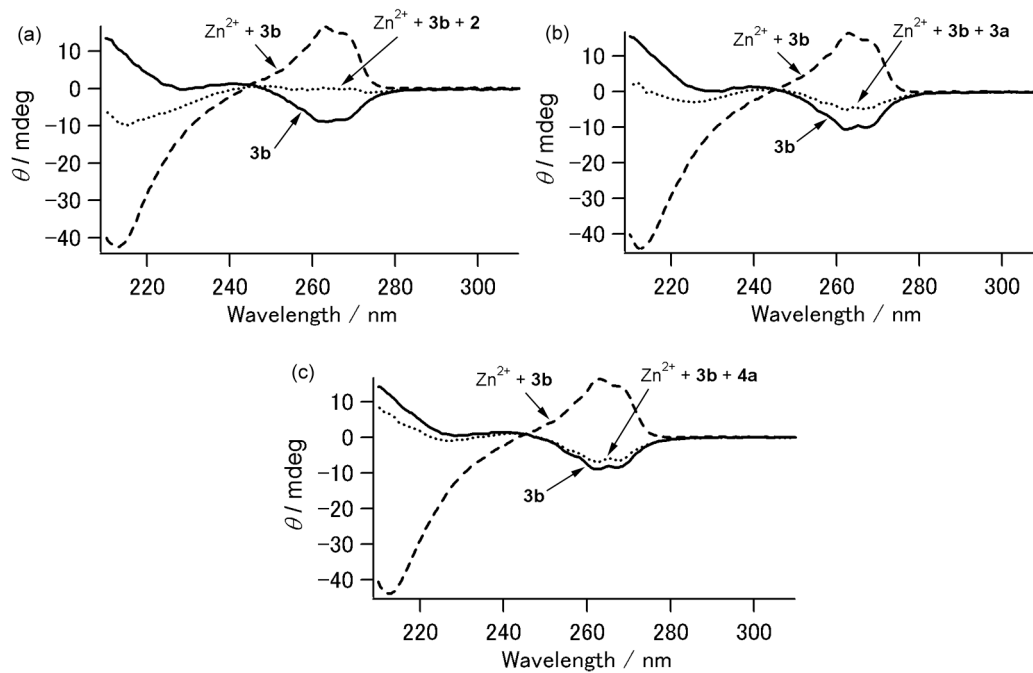

**Fig. S4.** Competitive  $\text{Zn}(\text{ClO}_4)_2$  complexation experiments of ligands **2**, **3a** and **4a** with chiral ligand **3b** in  $\text{H}_2\text{O}$ . (—):  $[\mathbf{3b}] = 6.0 \times 10^{-5} \text{ mol/L}$ , ( $\cdot \cdot \cdot$ ):  $[\mathbf{3b}] = [\mathbf{2}, \mathbf{3a}, \text{ or } \mathbf{4a}] = [\text{Zn}^{2+}] = 6.0 \times 10^{-5} \text{ mol/L}$ , (---):  $[\mathbf{3b}] = 6.0 \times 10^{-5} \text{ mol/L}$ ,  $[\text{Zn}^{2+}] = 1.8 \times 10^{-4} \text{ mol/L}$ .

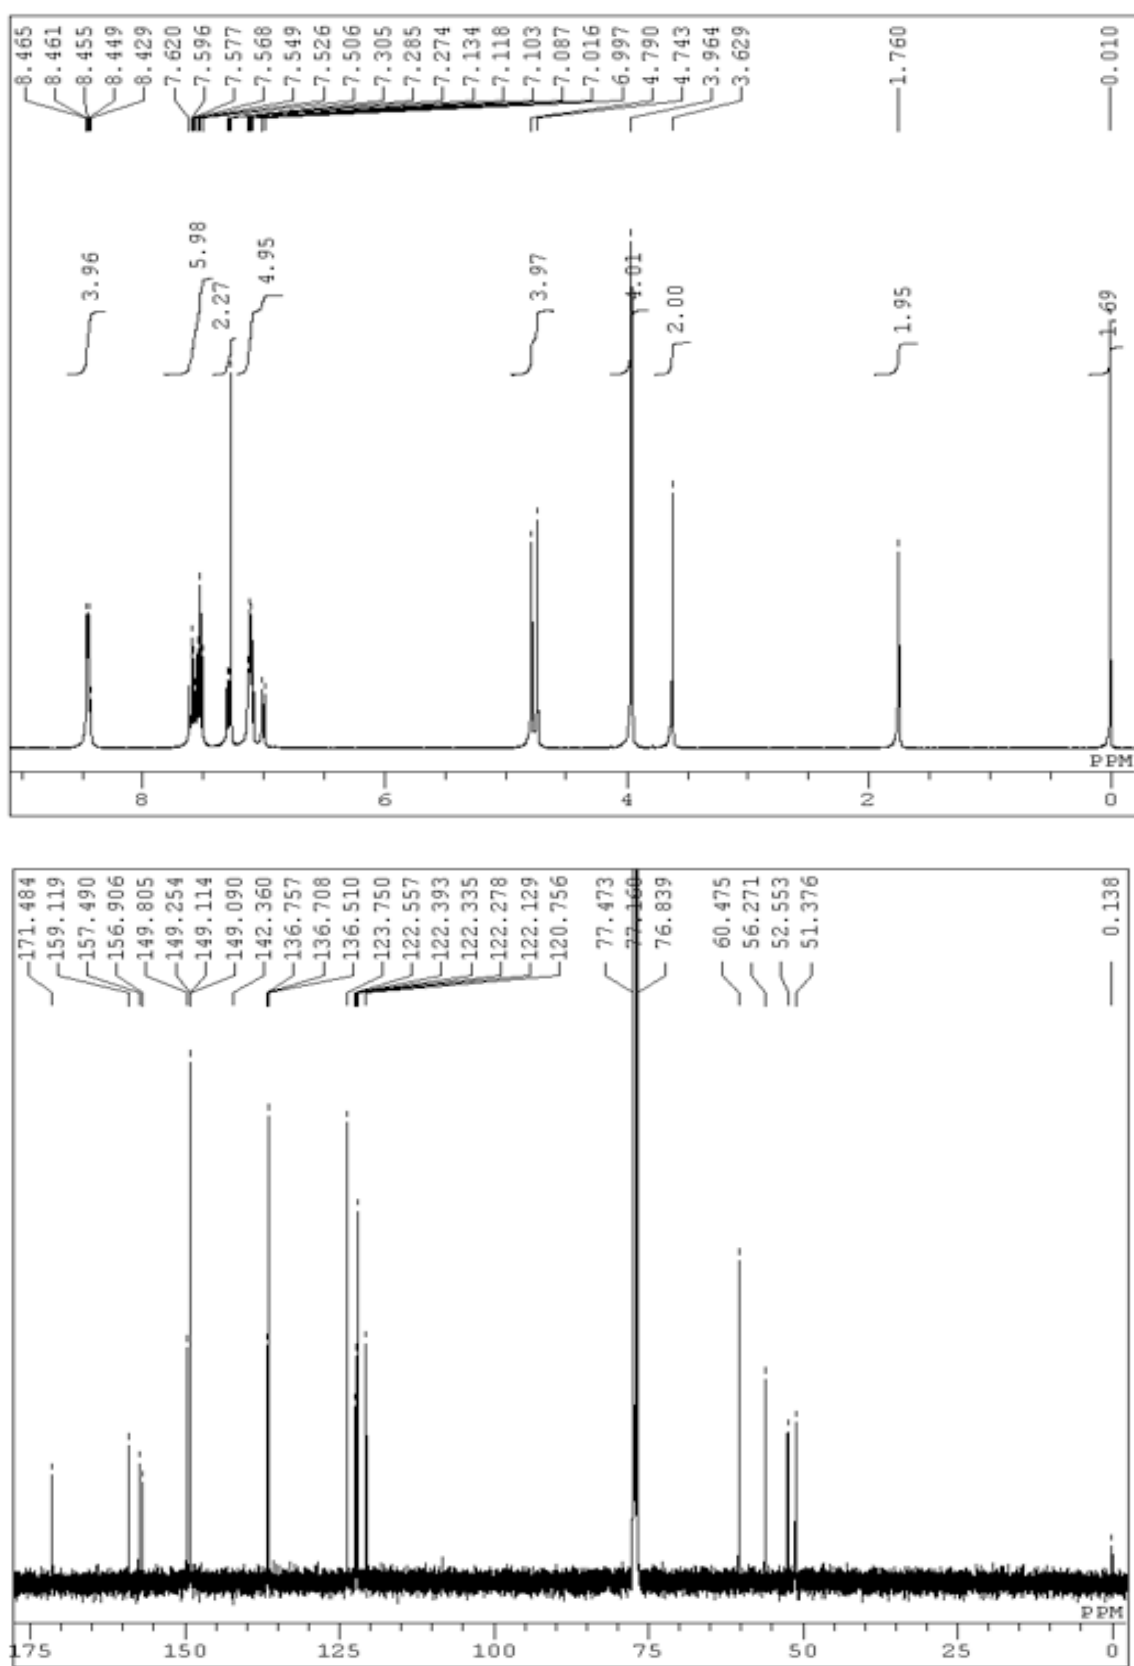

**Fig. S5.**  $^1\text{H}$  and  $^{13}\text{C}$  NMR spectra of ligand 3a.

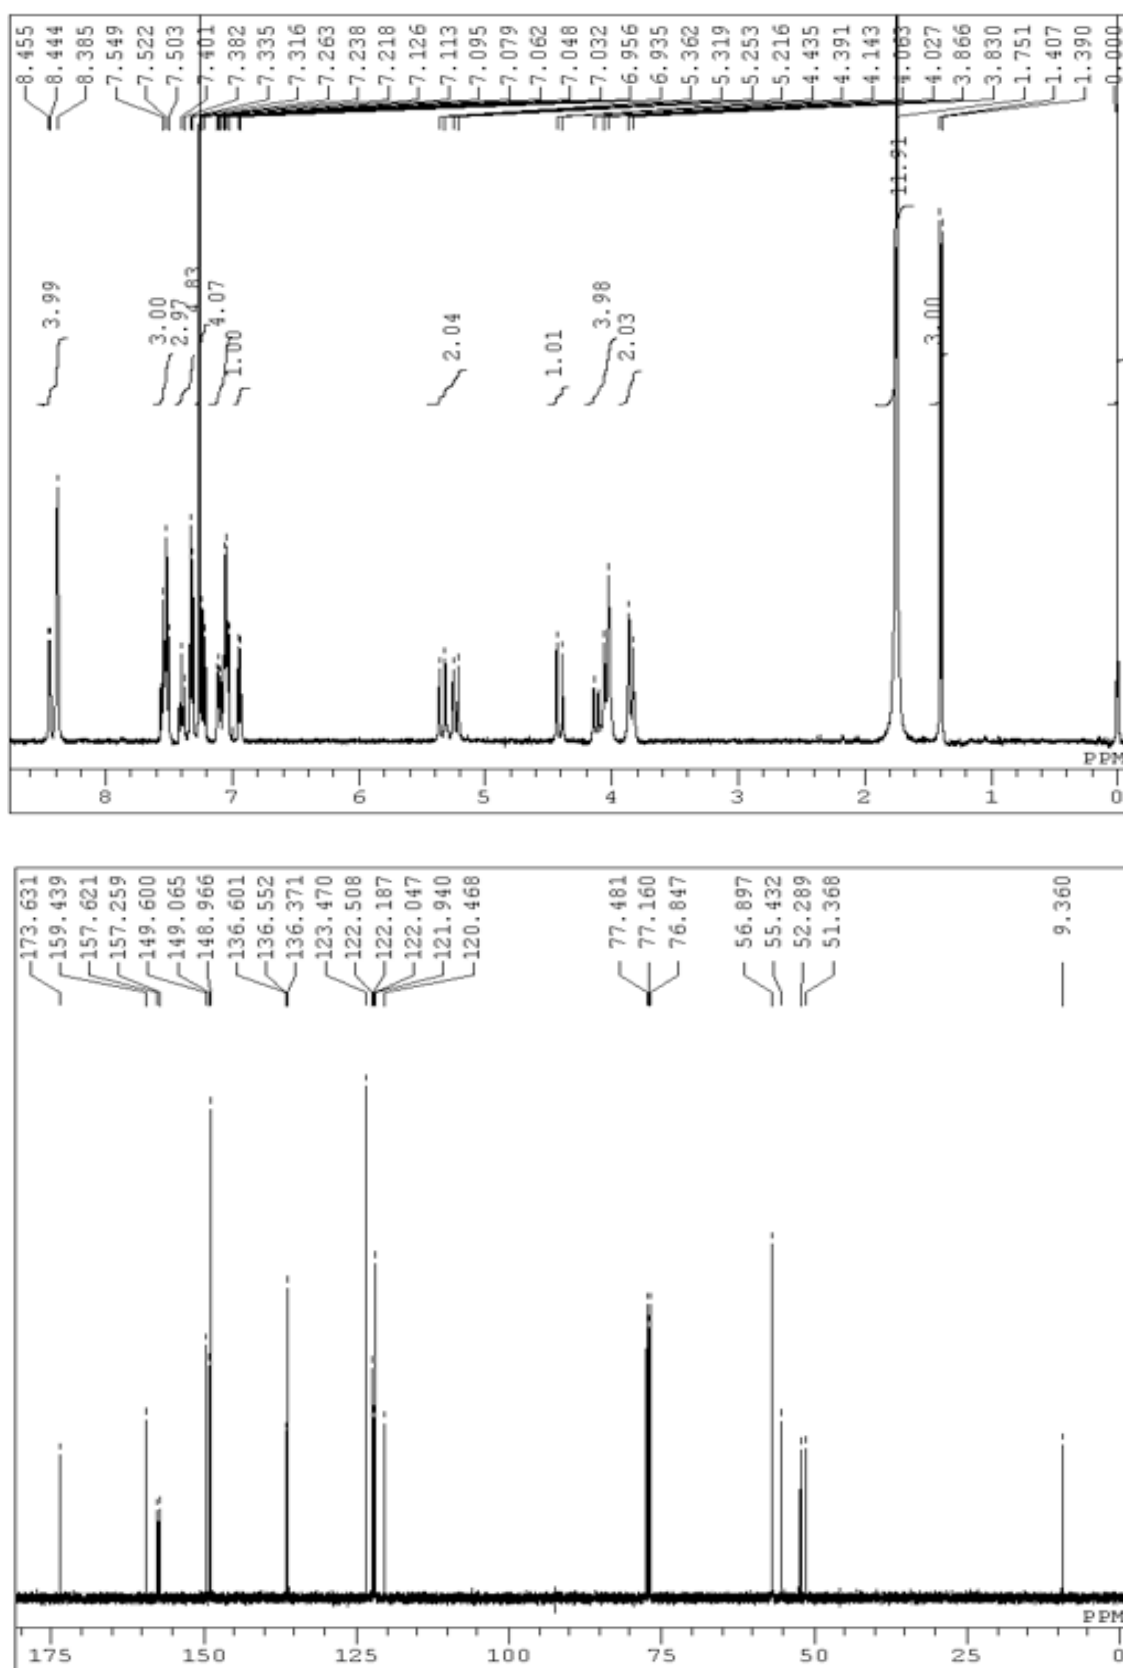

**Fig. S6.**  $^1\text{H}$  and  $^{13}\text{C}$  NMR spectra of ligand **3b**.

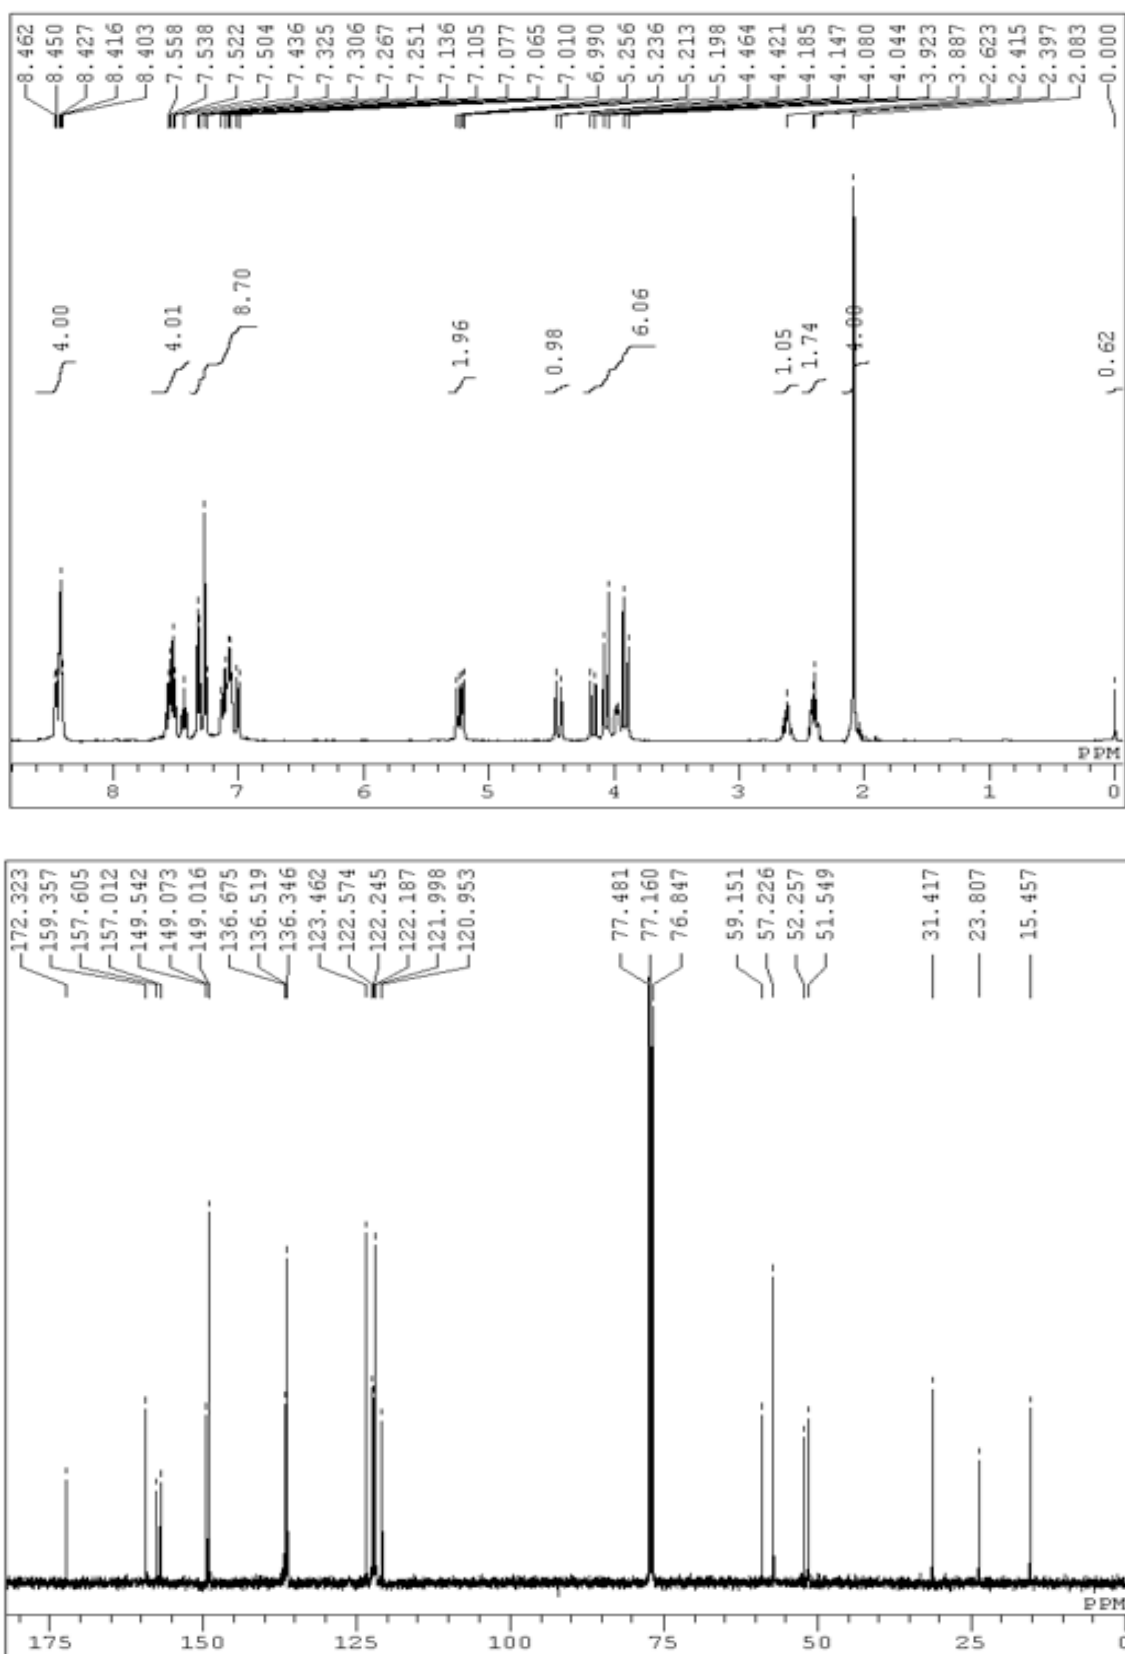

Fig. S7.  $^1\text{H}$  and  $^{13}\text{C}$  NMR spectra of ligand 3c.



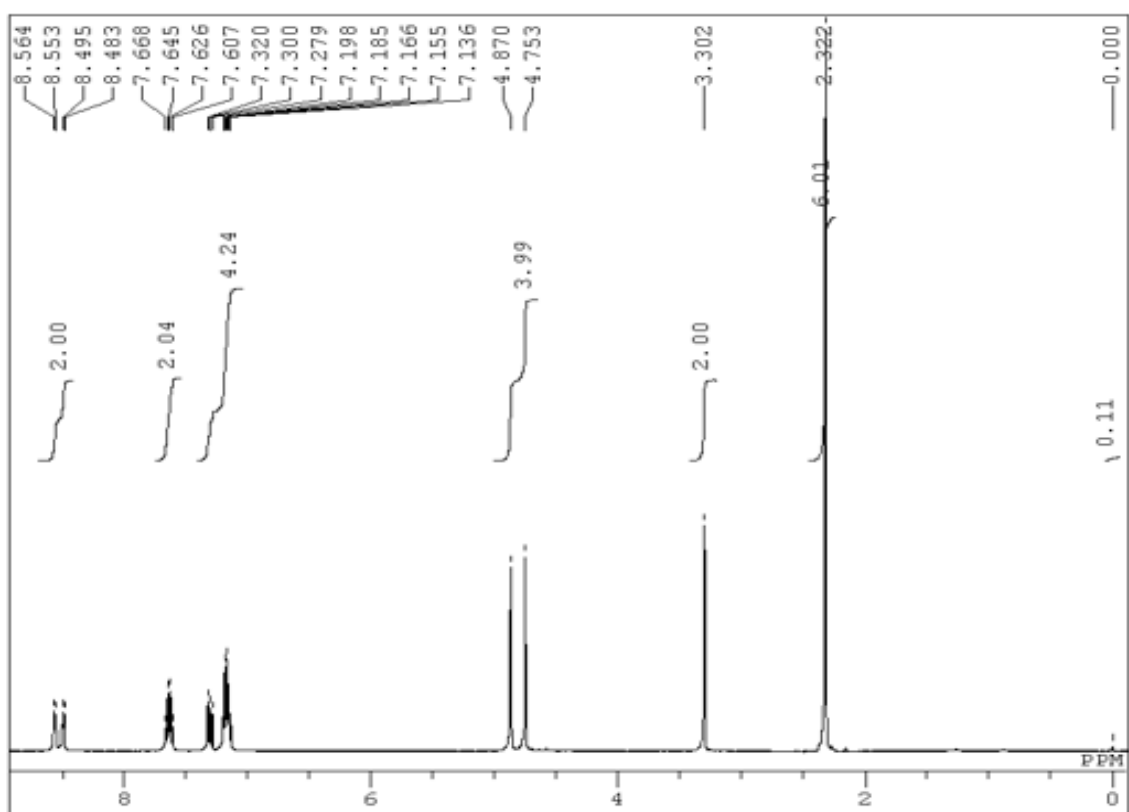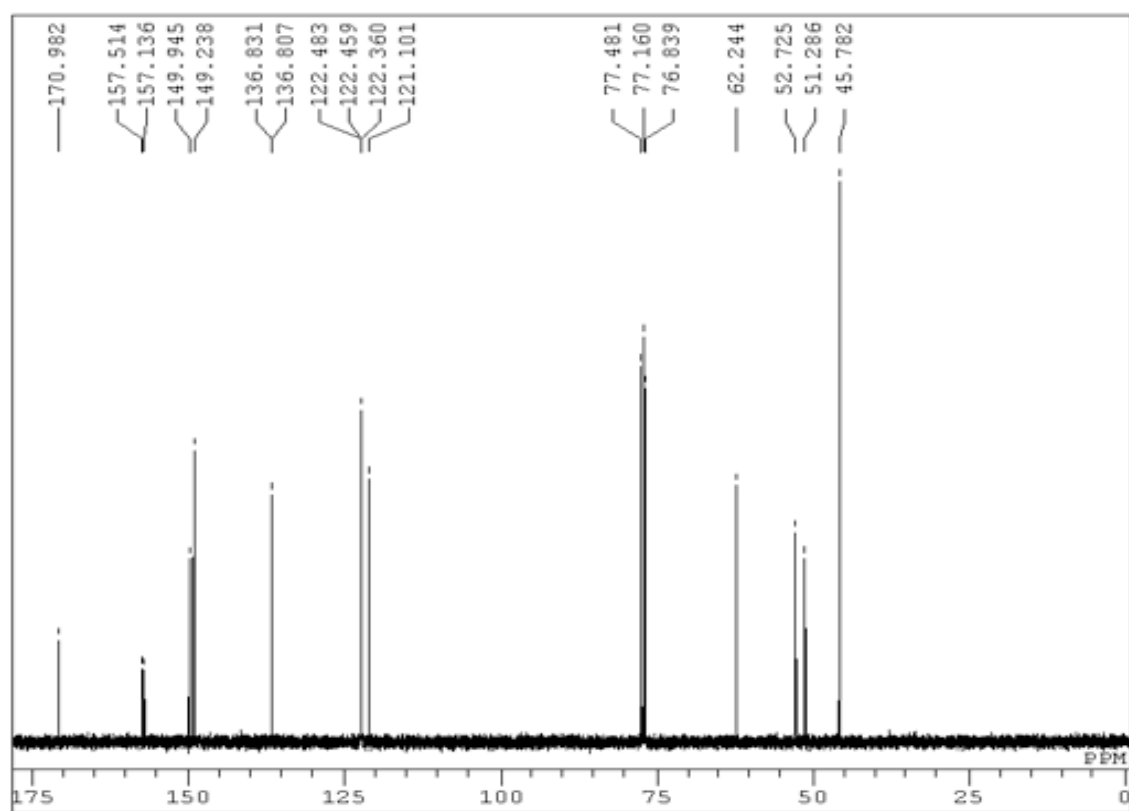

Fig. S8. <sup>1</sup>H and <sup>13</sup>C NMR spectra of ligand 4b.
